# Supplementary material for: Protein N-glycosylation and N-glycan trimming are required for postembryonic development of the pest beetle Tribolium castaneum
Source: PubMed Central journal article supplement (PMC5059678; doi:10.1038/srep35151), 2016-10-12
Supplement: srep35151-s4.pdf [file srep35151-s4.pdf]

# **Protein *N*-glycosylation and *N*-glycan trimming are required for postembryonic development of the pest beetle**

***Tribolium castaneum***

Tomasz Walski<sup>1,2</sup>, Els J. M. Van Damme<sup>2</sup>, Nicolas Smargiasso<sup>3</sup>, Olivier Christiaens<sup>1</sup>, Edwin De Pauw<sup>3</sup>, Guy Smaghe<sup>1</sup>

<sup>1</sup>Laboratory of Agrozoology, Department of Crop Protection, Faculty of Bioscience Engineering, Ghent University, Ghent, Belgium

<sup>2</sup>Laboratory of Biochemistry and Glycobiology, Department of Molecular Biotechnology, Faculty of Bioscience Engineering, Ghent University, Ghent, Belgium

<sup>3</sup>Mass Spectrometry Laboratory, GIGA-Research, University of Liege, Liege, Belgium

**Supplementary information**

**Supplementary Table 1. Developmental expression changes of genes putatively involved in N-glycan attachment and processing in *T. castaneum***

| Gene               | ANOVA<br>P | Stage with the highest expression<br>vs 4 <sup>th</sup> instar larvae |                              |             | Mature adults<br>vs 4 <sup>th</sup> instar larvae |             |
|--------------------|------------|-----------------------------------------------------------------------|------------------------------|-------------|---------------------------------------------------|-------------|
|                    |            | Stage                                                                 | Expression ratio<br>(95% CI) | t-test<br>P | Expression ratio<br>(95% CI)                      | t-test<br>P |
| <i>TcDad1</i>      | <0.001     | Early pupae                                                           | 1.87 (1.34-2.56)             | <0.001      | 1.08 (0.78-1.49)                                  | 0.262       |
| <i>TcStt3A</i>     | 0.011      | Early pupae                                                           | 2.35 (1.11-4.35)             | 0.029       | 1.15 (0.58-2.26)                                  | 0.123       |
| <i>TcStt3B</i>     | 0.547      | Late pupae                                                            | 1.32 (0.53-3.13)             | 0.998       | 1.01 (0.42-2.45)                                  | 0.472       |
| <i>TcGCS1</i>      | 0.001      | Late pupae, pharate<br>adults                                         | 2.86 (1.34-6.45)             | 0.018       | 2.25 (1.07-5.15)                                  | 0.032       |
| <i>TcGCS2a</i>     | 0.013      | Early pupae                                                           | 3.03 (1.21-11.76)            | 0.018       | 2.30 (0.91-8.85)                                  | 0.029       |
| <i>Tca-Man-Ia</i>  | <0.001     | Late pupae                                                            | 1.74 (1.21-2.49)             | 0.002       | 1.46 (1.01-2.07)                                  | 0.031       |
| <i>Tca-Man-Ib</i>  | <0.001     | Pharate adults                                                        | 2.97 (1.66-5.85)             | 0.001       | 2.53 (1.39-4.90)                                  | 0.012       |
| <i>TcMgat1</i>     | 0.025      | Late pupae                                                            | 1.86 (0.92-4.24)             | 0.111       | 1.35 (0.66-3.06)                                  | 0.128       |
| <i>Tca-Man-IIa</i> | <0.001     | Early pupae                                                           | 3.88 (1.80-8.26)             | 0.004       | 2.33 (5.18-1.12)                                  | 0.008       |
| <i>Tca-Man-IIb</i> | <0.001     | Early pupae                                                           | 3.59 (1.71-7.94)             | 0.002       | 2.23 (1.05-4.90)                                  | 0.022       |
| <i>Tcfdl</i>       | 0.009      | Early pupae                                                           | 4.86 (1.21-23.26)            | <0.001      | 1.37 (0.26-5.05)                                  | 0.316       |
| <i>TcFucT6</i>     | 0.003      | Early pupae                                                           | 4.14 (1.63-16.39)            | <0.001      | 2.55 (1.03-10.31)                                 | 0.011       |
| <i>TcFucTA</i>     | 0.001      | 4 <sup>th</sup> inst. larvae                                          | 1.00                         | -           | 0.74 (0.23-2.37)                                  | 0.101       |
| <i>TcFucTA/C</i>   | <0.001     | Late pupae                                                            | 8.11 (3.75-15.63)            | <0.001      | 2.55 (1.24-5.21)                                  | 0.006       |
| <i>TcFucTB</i>     | <0.001     | Early pupae                                                           | 4.56 (2.59-8.26)             | <0.001      | 2.35 (1.31-4.20)                                  | 0.012       |
| <i>TcFucTC</i>     | <0.001     | Prepupae                                                              | 2.68 (1.64-4.59)             | <0.001      | 1.63 (0.97-2.71)                                  | 0.059       |
| <i>TcMgat2</i>     | <0.001     | Early pupae                                                           | 4.77 (1.87-16.13)            | 0.004       | 2.65 (1.07-9.26)                                  | 0.007       |
| <i>TcMgat4</i>     | 0.004      | Late pupae                                                            | 9.21 (2.18-142.86)           | 0.003       | 4.08 (1.01-62.50)                                 | 0.006       |
| <i>TcβGalNAcTA</i> | <0.000     | Early pupae                                                           | 10.24 (2.74-38.46)           | 0.003       | 2.57 (0.75-10.31)                                 | 0.037       |
| <i>TcβGalNAcTB</i> | <0.000     | Early pupae                                                           | 2.15 (1.41-3.28)             | 0.001       | 1.60 (1.05-2.44)                                  | 0.016       |
| <i>TcST6Gal</i>    | <0.000     | Late pupae                                                            | 3.55 (2.18-6.06)             | <0.001      | 2.77 (1.71-4.76)                                  | 0.001       |
| <i>TcCsas</i>      | <0.000     | Early pupae                                                           | 6.60 (2.96-16.13)            | 0.001       | 5.65 (2.61-14.29)                                 | 0.002       |

ANOVA P – p-value obtained using ANOVA in qbase+ software to reveal life stage dependent changes in expression. T-test P – p-value obtained via independent sample t-test to compare expression between 4<sup>th</sup> instar larvae and life stage with highest expression or between 4<sup>th</sup> instar larvae and mature adults. All values are averages of 3 biological replications. 95% CI are 95% confidence intervals for expression ratio between indicated life stages.

**Supplementary Table 2. N-glycan content**

|     | Measured<br>m/z<br>[M+Na <sup>+</sup> ] | Larva    | Adult    | Glycan content [% total profile] |                                |                                 | Deduced structure                                                                     | Composition      |
|-----|-----------------------------------------|----------|----------|----------------------------------|--------------------------------|---------------------------------|---------------------------------------------------------------------------------------|------------------|
|     |                                         |          |          | L vs. A<br>P                     | $\alpha$ -Man-Ia<br>RNAi Adult | A vs.<br>A <sup>RNAi</sup><br>P |                                                                                       |                  |
| 1.  | 891.3                                   | 3.5±0.7  | 6.1±0.9  | 0.004                            | 3.8±0.1                        | 0.007                           |    | HexNAc2Hex2      |
| 2.  | 1021.4                                  | 0.2±0.4  | 1.2±0.2  | 0.005                            | 0.1±0.1                        | 0.001                           |    | HexNAc2HexdHex2  |
| 3.  | 1037.4                                  | 11.5±3.1 | 21.9±5.8 | 0.013                            | 4.6±0.3                        | 0.003                           |    | HexNAc2Hex2dHex  |
| 4.  | 1053.3                                  | 3.4±0.7  | 4.7±0.4  | 0.015                            | 4.8±0.2                        | 0.294                           |    | HexNAc2Hex3      |
| 5.  | 1183.5                                  | 7.3±1.3  | 11±3.8   | 0.063                            | 1.8±0.2                        | 0.007                           |    | HexNAc2Hex2dHex2 |
| 6.  | 1199.4                                  | 4.0±0.8  | 8.4±1.1  | 0.001                            | 1.8±0.2                        | 0.000                           |    | HexNAc2Hex3dHex  |
| 7.  | 1215.5                                  | 2.4±0.5  | 3.5±0.2  | 0.010                            | 4.7±0.2                        | 0.001                           |    | HexNAc2Hex4      |
| 8.  | 1256.5                                  | 0.8±0.3  | 0.7±0.4  | 0.297                            | 0.1±0                          | 0.034                           |    | HexNAc3Hex3      |
| 9.  | 1345.5                                  | 1.2±0.4  | 1.2±0.2  | 0.391                            | 0.2±0                          | 0.000                           |    | HexNAc2Hex3dHex2 |
| 10. | 1361.5                                  | 0.2±0.2  | 0.7±0.3  | 0.029                            | 0.1±0                          | 0.023                           |    | HexNAc2Hex4dHex  |
| 11. | 1377.5                                  | 3.3±0.4  | 4.5±0.3  | 0.003                            | 5.5±0.3                        | 0.013                           |    | HexNAc2Hex5      |
| 12. | 1402.5                                  | 1.0±0.3  | 1.4±0.3  | 0.105                            | 0.4±0                          | 0.003                           |    | HexNAc3Hex3dHex  |
| 13. | 1418.4                                  | 0.3±0.1  | 0.1±0.1  | 0.016                            | <0.1                           | 0.082                           |    | HexNAc3Hex4      |
| 14. | 1539.5                                  | 2.9±0.3  | 2.6±0.4  | 0.231                            | 5.6±0.3                        | 0.000                           |    | HexNAc2Hex6      |
| 15. | 1548.5                                  | 0.2±0.2  | 0.4±0.3  | 0.139                            | <0.1                           | 0.049                           |    | HexNAc3Hex3dHex2 |
| 16. | 1580.5                                  | 0.3±0.1  | 0.2±0.1  | 0.161                            | n.d.                           | -                               |    | HexNAc3Hex5      |
| 17. | 1605.5                                  | 0.2±0.1  | 0.3±0.2  | 0.160                            | <0.1                           | 0.039                           |    | HexNAc4Hex3dHex  |
| 18. | 1701.6                                  | 3.9±0.4  | 2.6±0.5  | 0.005                            | 11.0±0.4                       | <0.001                          |  | HexNAc2Hex7      |
| 19. | 1863.6                                  | 6.9±0.7  | 3.8±0.9  | 0.002                            | 15.9±0.6                       | <0.001                          |  | HexNAc2Hex8      |
| 20. | 2025.7                                  | 40.7±7.4 | 22.0±6.0 | 0.008                            | 35.5±1.5                       | 0.010                           |  | HexNAc2Hex9      |
| 21. | 2187.7                                  | 5.8±1.4  | 2.2±0.4  | 0.004                            | 4.0±0.5                        | 0.005                           |  | HexNAc2Hex10     |

[M+Na]<sup>+</sup> indicate measured masses of sodiated 2-AB-glycan ions. Glycan content values are means of glycan abundance relative to all glycans detected ± standard deviation (n=4). P's were calculated using independent sample t-test (SPSS 22).

Supplementary Table S3. Primers used for qRT-PCR analysis of gene expression.

| gene                       | <i>Tribolium</i><br>accession<br>number |   | qRT-PCR primer sequence  | Amplicon<br>length | Efficiency<br>(%) |
|----------------------------|-----------------------------------------|---|--------------------------|--------------------|-------------------|
| <i>TcDad1</i>              | TC016366                                | F | CCACAGGTGACTTCAGTTATCG   | 147                | 92.5              |
|                            |                                         | R | AAAAGTGCCCAACAAGACAGC    |                    |                   |
| <i>TcStt3A</i>             | TC010433                                | F | TGTGCTACTACCGCTTTGGG     | 148                | 94.7              |
|                            |                                         | R | ATACGCACGAGCCAGTGTTT     |                    |                   |
| <i>TcStt3B</i>             | TC009183                                | F | CCCCTTCATGTGTTTGTCC      | 141                | 101.1             |
|                            |                                         | R | TCGCTGGTACGAATGGGTTG     |                    |                   |
| <i>TcGCS1</i>              | TC011354                                | F | ATCGGCCCTCAGTAACATGC     | 132                | 95.5              |
|                            |                                         | R | AAACTTCGAGACGGGACTGC     |                    |                   |
| <i>TcGCS2a</i>             | TC032148                                | F | GGGAAGGGGAACAAGAGGTG     | 103                | 97.6              |
|                            |                                         | R | TCAACACCCACTGCTTCAGG     |                    |                   |
| <i>Tca-Man-Ia</i>          | TC011089                                | F | AATGCAAGCTGTCCTCCAAC     | 124                | 97.6              |
|                            |                                         | R | CAGACCACCCGAAAAACAAC     |                    |                   |
| <i>Tca-Man-Ib</i>          | TC014283                                | F | ACGTGCTATTTGCCTGGAAC     | 83                 | 98.9              |
|                            |                                         | R | TTCGGGTGCTAGAAATGTGG     |                    |                   |
| <i>TcMgat1</i>             | TC009001                                | F | ACCAGGAGTTGAAAGAGGGC     | 147                | 94.1              |
|                            |                                         | R | TACCCTTGACGCAGTTCGG      |                    |                   |
| <i>Tca-Man-IIa</i>         | TC009186                                | F | CAAAGCGAAGAAAGGAGTGG     | 104                | 97.2              |
|                            |                                         | R | ACGATCGGTCTTGAATCAC      |                    |                   |
| <i>Tca-Man-IIb</i>         | TC002991                                | F | GGAGTTCCCCTGTGATACGC     | 124                | 95.2              |
|                            |                                         | R | ACTCACAGCACAGTCGTAGC     |                    |                   |
| <i>Tcfdl</i>               | TC009779                                | F | CCCAGAGTTTTCTTTGGTG      | 123                | 91.6              |
|                            |                                         | R | CTCTGATTCGGGCATATTCG     |                    |                   |
| <i>TcFucT6</i>             | TC008521                                | F | ATTGCTTGCCTGGAGACCAG     | 117                | 103.5             |
|                            |                                         | R | TGGGCTCTTCTTTCGCACTC     |                    |                   |
| <i>TcFucTA/C</i>           | TC005825                                | F | ACGTCACGGAGAAGCTTTGG     | 83                 | 94.2              |
|                            |                                         | R | CCTGTAATCGCCACGGAAG      |                    |                   |
| <i>TcFucTA</i>             | TC014343                                | F | CACCCTCCAGTTTCCAGACC     | 136                | 92.0              |
|                            |                                         | R | CGACCAGATCGCTGTCTCTG     |                    |                   |
| <i>TcFucTB</i>             | TC007385                                | F | ACAACGAACAACCTGCTCCAC    | 80                 | 91.6              |
|                            |                                         | R | GATGTAGTCGTCGCAAATGG     |                    |                   |
| <i>TcFucTC<sup>§</sup></i> | TC008651/2                              | F | CGACAAACCAACCTTTCTGG     | 71                 | 90.6              |
|                            |                                         | R | GGCTTTGGAACATTGGTGTC     |                    |                   |
| <i>TcMgat2</i>             | TC001867                                | F | CCCATACTCGATCCAAACACATCC | 112                | 97.7              |
|                            |                                         | R | GAGGGCATTGTTGCATTTCTGG   |                    |                   |
| <i>TcMgat4</i>             | TC003870                                | F | GGTGCCTACAAACCTTCGC      | 147                | 94.3              |
|                            |                                         | R | ATTCTGAGACGACTTCCGC      |                    |                   |
| <i>Tcβ4GalNAcTA</i>        | TC006388                                | F | GCAAGATACACGATGCTGACG    | 92                 | 91.0              |
|                            |                                         | R | TCCTTGTCGAAGCGTTTGGG     |                    |                   |
| <i>Tcβ4GalNAcTB</i>        | TC006987                                | F | CGTGTGTGAGCAAACCAAG      | 103                | 97.1              |
|                            |                                         | R | CGATGAAATCGCCACAACCTCC   |                    |                   |
| <i>TcST6Gal</i>            | TC014265                                | F | CTCACCGAGCAGACTTAGGAG    | 124                | 94.0              |
|                            |                                         | R | GCGTTTAGTGACCCTGGTTG     |                    |                   |
| <i>TcCsas</i>              | TC015995                                | F | CAAGGGAAAGGAGTGTGTCTTC   | 119                | 92.5              |
|                            |                                         | R | CTTGTCTTCGTGGTCGATTG     |                    |                   |
| <i>TcRpS6</i>              | TC010830                                | F | GAATATCGGGCGGGAACGAC     | 150                | 95.7              |
|                            |                                         | R | TGCACCCTCTAACTGACTTGC    |                    |                   |
| <i>TcRpL32</i>             | TC006106                                | F | ACCAGTCTGACCGTTATGGC     | 114                | 94.2              |
|                            |                                         | R | CGTAGCCAATGTTGGGCATC     |                    |                   |

§ - primer for FucTC was designed to detect both FucTC paralogs TC008651 and TC008652. The paralogs share 87% identical aminoacids.

Supplementary Table S4. Primers used for dsRNA synthesis and dsRNAs obtained from *Eupheria*

| Target gene                    | <i>Tribolium</i><br>accession<br>number |   | Primer sequence                            | dsRNA<br>length |
|--------------------------------|-----------------------------------------|---|--------------------------------------------|-----------------|
| <i>TcDad1</i>                  | TC016366                                | F | taatacgactcactatagggTGCCACAGGTGACTTCAGTT   | 367             |
|                                |                                         | R | taatacgactcactatagggATGTAGGACCACATGGGCG    |                 |
| <i>TcGCS1</i>                  | TC011354                                | F | taatacgactcactatagggCAACAACCAATCGTGAGCTG   | 374             |
|                                |                                         | R | taatacgactcactatagggGACCAATCGGTATTCGGGAT   |                 |
| <i>Tca-Man-Ia</i>              | TC011089                                | F | taatacgactcactatagggCTTGGGGCAAGAACGAACT    | 381             |
|                                |                                         | R | taatacgactcactatagggCCAGTCTGTGTCTGAAACGC   |                 |
| <i>Tca-Man-Ib</i>              | TC014283                                | F | taatacgactcactatagggCTAGTCTCGACCGAATCCGA   | 385             |
|                                |                                         | R | taatacgactcactatagggTGTCAATCGAGTCAACAATGC  |                 |
| <i>Tca-Man-IIa</i>             | TC009186                                | F | taatacgactcactatagggTGTCCATGGAAAGTGCCC     | 365             |
|                                |                                         | R | taatacgactcactatagggAAAAATCGCCCGATAACGA    |                 |
| <i>Tca-Man-IIb</i>             | TC002991                                | F | taatacgactcactatagggGGCCATAGGCCTCACAAATA   | 423             |
|                                |                                         | R | taatacgactcactatagggTTCATTATCTGGCGGGAGAC   |                 |
| <i>TcFucTA/C</i>               | TC005825                                | F | taatacgactcactatagggAATCGAAATTTTCAGCGTCCG  | 435             |
|                                |                                         | R | taatacgactcactatagggCACAAATTCGAGCCCATGAT   |                 |
| <i>TcFucTA</i>                 | TC014343                                | F | taatacgactcactatagggATGCCTCCGCGACTCTCT     | 378             |
|                                |                                         | R | taatacgactcactatagggGGCAAGAATCACTTTCTCCG   |                 |
| <i>Tcβ4GalNAcTA</i>            | TC006388                                | F | taatacgactcactatagggACGCTCCATCTCAAGAAAGC   | 500             |
|                                |                                         | R | taatacgactcactatagggTCTTCCGCAACAAATCAAT    |                 |
| <i>TcST6Gal</i>                | TC014265                                | F | taatacgactcactatagggACGCTCATGATTTGGTTTTG   | 374             |
|                                |                                         | R | taatacgactcactatagggCAAAAACCCCGACGATAGTG   |                 |
| <i>TcCsas</i>                  | TC015995                                | F | taatacgactcactatagggTCTTTTTTCATGCAAATCCAGC | 395             |
|                                |                                         | R | taatacgactcactatagggACGTACTGCACCAAAGCA     |                 |
| <b>Eupheria catalog number</b> |                                         |   |                                            |                 |
| <i>TcStt3A</i>                 | TC010433                                |   | iB_01689                                   | 479             |
| <i>TcStt3B</i>                 | TC009183                                |   | iB_01492                                   | 497             |
| <i>TcGCS2a</i>                 | TC032148                                |   | iB_00458                                   | 501             |
| <i>TcMgat1</i>                 | TC009001                                |   | iB_01454                                   | 489             |
| <i>Tcfdl</i>                   | TC009779                                |   | iB_04695                                   | 490             |
| <i>TcFucT6</i>                 | TC008521                                |   | iB_04509                                   | 481             |
| <i>TcMgat2</i>                 | TC001867                                |   | iB_03261                                   | 482             |
| <i>TcMgat4</i>                 | TC003870                                |   | iB_00631                                   | 483             |
| <i>Tcβ4GalNAcTB</i>            | TC006987                                |   | iB_06724                                   | 391             |

taatacgactcactataggg – is a T7 promoter sequence. F- forward, R - reverse.

**Supplementary Figure 1. Phylogeny of proteins putatively involved in N-glycan attachment and processing**

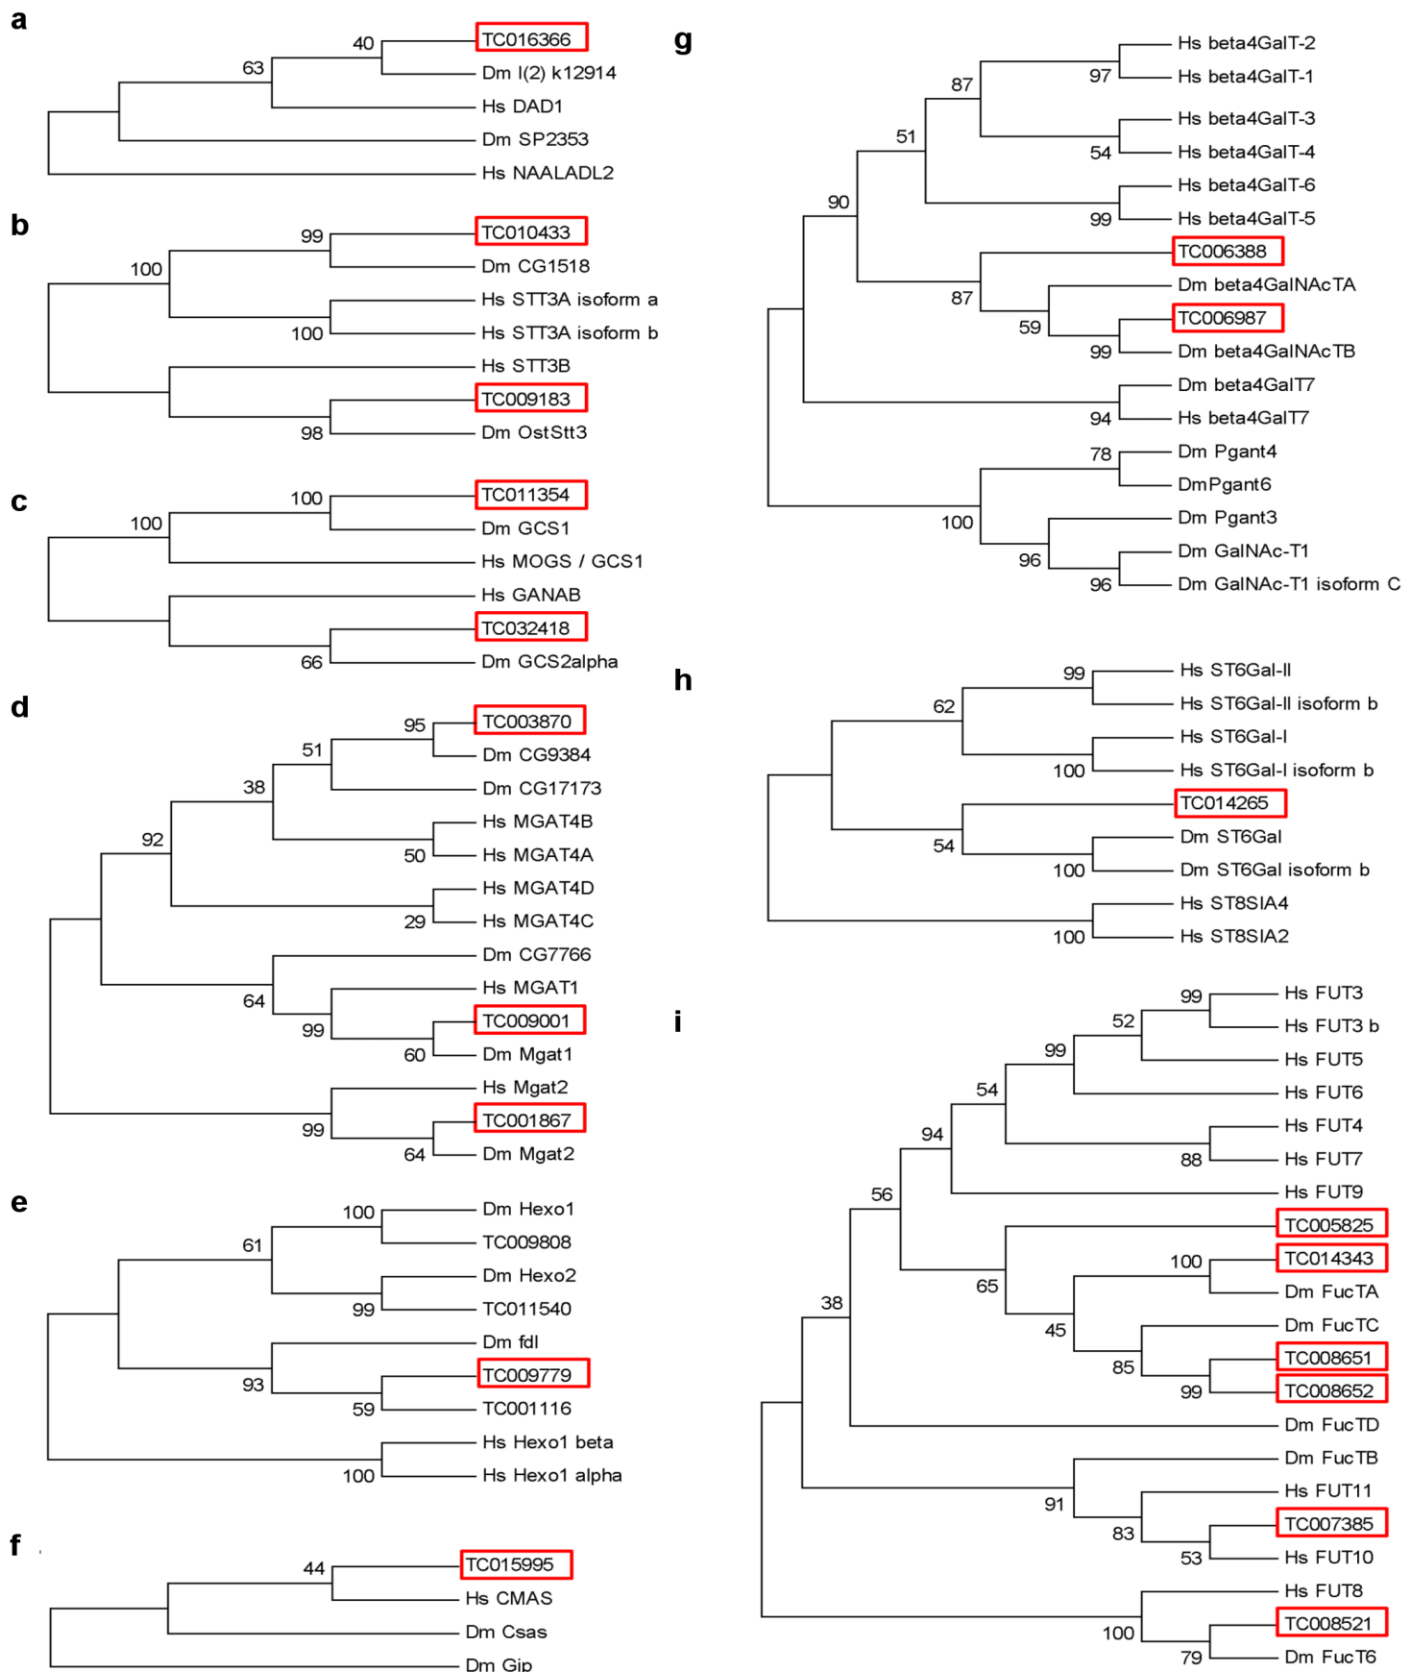

**Fig. S1. Phylogeny of proteins putatively involved in N-glycan attachment and processing in *Tribolium castaneum*.** The evolutionary history was inferred by using the Maximum Likelihood method based on the Poisson correction model. Branches corresponding to partitions reproduced in less than 50% bootstrap replicates are collapsed. The percentages of replicate trees in which the associated taxa clustered together in the bootstrap test (1000 replicates) are shown next to the branches. Hs - *homo sapiens*, Dm -

*Drosophila melanogaster*, TC0##### are putative *Tribolium castaneum* orthologs obtained from <http://bioinf.uni-greifswald.de/gb2/gbrowse/tcas4>. *Tribolium* orthologs studied in this paper are in brackets. **(a)** DAD1 orthologs. RefSeq accessions: Hs DAD1 - NP 001335.1; Dm lethal (2) k12914 - NP 609222.1; Dm SP2353 - NP 611082.2; Hs NAALDL2 - XP 011510919.1. The latter two sequences are remotely related and are used as outgroups to improve the quality of tree. **(b)** Orthologs of STT3 subunits. RefSeq accessions: Hs STT3A - NP 689926.1, NP 001265433.1; Hs STT3B - NP 849193.1; Dm CG1518 - NP 608425.1; Dm OstStt3 - NP 524494.1. **(c)** Orthologs of  $\alpha$ -glucosidases. RefSeq accessions: Hs MOGS/GCS1 - NP\_001139630.1; Hs GANAB - NP\_001265121.1; Dm GCS1 - NP\_001245621.1; Dm GCS2 $\alpha$  - NP\_652145.1. **(d)** Orthologs of GlcNAc transferases, RefSeq accessions: Hs MGAT1 - NP 002397.2; Hs MGAT2 - NP 002399.1; Hs MGAT4A - NP 036346.1; Hs MGAT4B - NP 055090.1; Hs MGAT4C - NP 037376.2; Hs MGAT4D - NP 001264282.1; Dm Mgat1 - NP 525117.2; Dm Mgat2 - NP 001263096.1; Dm CG9384 - NP 648720.3; Dm CG17173 - NP 648721.1; Dm CG7766 - NP 001138180.1. **(e)** Orthologs of N-acetylglucosaminidases, RefSeq accessions: Hs Hexo1 $\alpha$  - NP 000511.1; Hs Hexo1 $\beta$  - NP 000512.1; Dm Hexo1 - NP 728975.1; Dm Hexo2 - NP 525081.1; Dm fdl - NP 001286351.1. **(f)** Orthologs of CMP-sialic acid synthase, RefSeq accessions: Hs CMAS - NP 061156.1; Dm Csas - ACH92492.1; Dm Gip - NP 511106.1 (distantly related sequence used as an outgroup for tree construction). **(g)** Orthologs of Gal/GalNAc transferases RefSeq accessions: Hs beta4GalT-2 isoform b - NP 003771.1; Hs beta4GalT-2 - NP 085076.2; Hs beta4GalT-1 - NP 001488.2; Hs beta4GalT-3 - NP 003770.1; Hs beta4GalT-4 - NP 003769.1; Hs beta4GalT-6 - NP 004766.2; Hs beta4GalT-5 - NP 004767.1; Hs beta4GalT7 - NP 651319.2; Dm beta4GalNAcTA - NP 610946.1; Dm beta4GalNAcTB - NP 651657.1; Dm beta4GalT7 - NP 009186.1; Dm Pgant4 - NP 001137779.1; Dm Pgant6 - NP 647749.2; Dm GalNAc-T1 - NP 611043.1; Dm GalNAc-T1 isoform C - NP 001286461.1. **(h)** Orthologs of sialic acid transferases, RefSeq accessions: Hs ST6Gal-II - NP 115917.1; Hs ST6Gal-II isoform b - NP 001135824.1; Hs ST6Gal-I - NP 003023.1; Hs ST6Gal-I isoform b - NP 775324.1; Hs ST8SIA4 - NP 005659.1; Hs ST8SIA2 - NP 006002.1; DmSt6Gal - NP 726474.1; DmSt6Gal isoform b - NP 523853.1. **(i)** Orthologs of Fucosyltransferases, RefSeq accessions: Hs FUT3 - NP 000140.1; Hs FUT5 - NP 002025.2; Hs FUT6 - NP 000141.1; Hs FUT4 - NP 002024.1; Hs FUT7 - NP 004470.1; Hs FUT9 - NP 006572.2; Hs FUT11 - NP 775811.2; Hs FUT10 - ref|NP 116053.3; Hs FUT8 - NP 835368.1; Dm FucTA - NP 648754.2; Dm FucTC - NP 001036320.3; Dm FucTD - NP 612107.1; Dm FucTB - |NP 609288.4; Dm FucT6 - NP 572740.1.

**Supplementary Figure 2. Phylogeny of putative *Tribolium*  $\alpha$ -mannosidases**

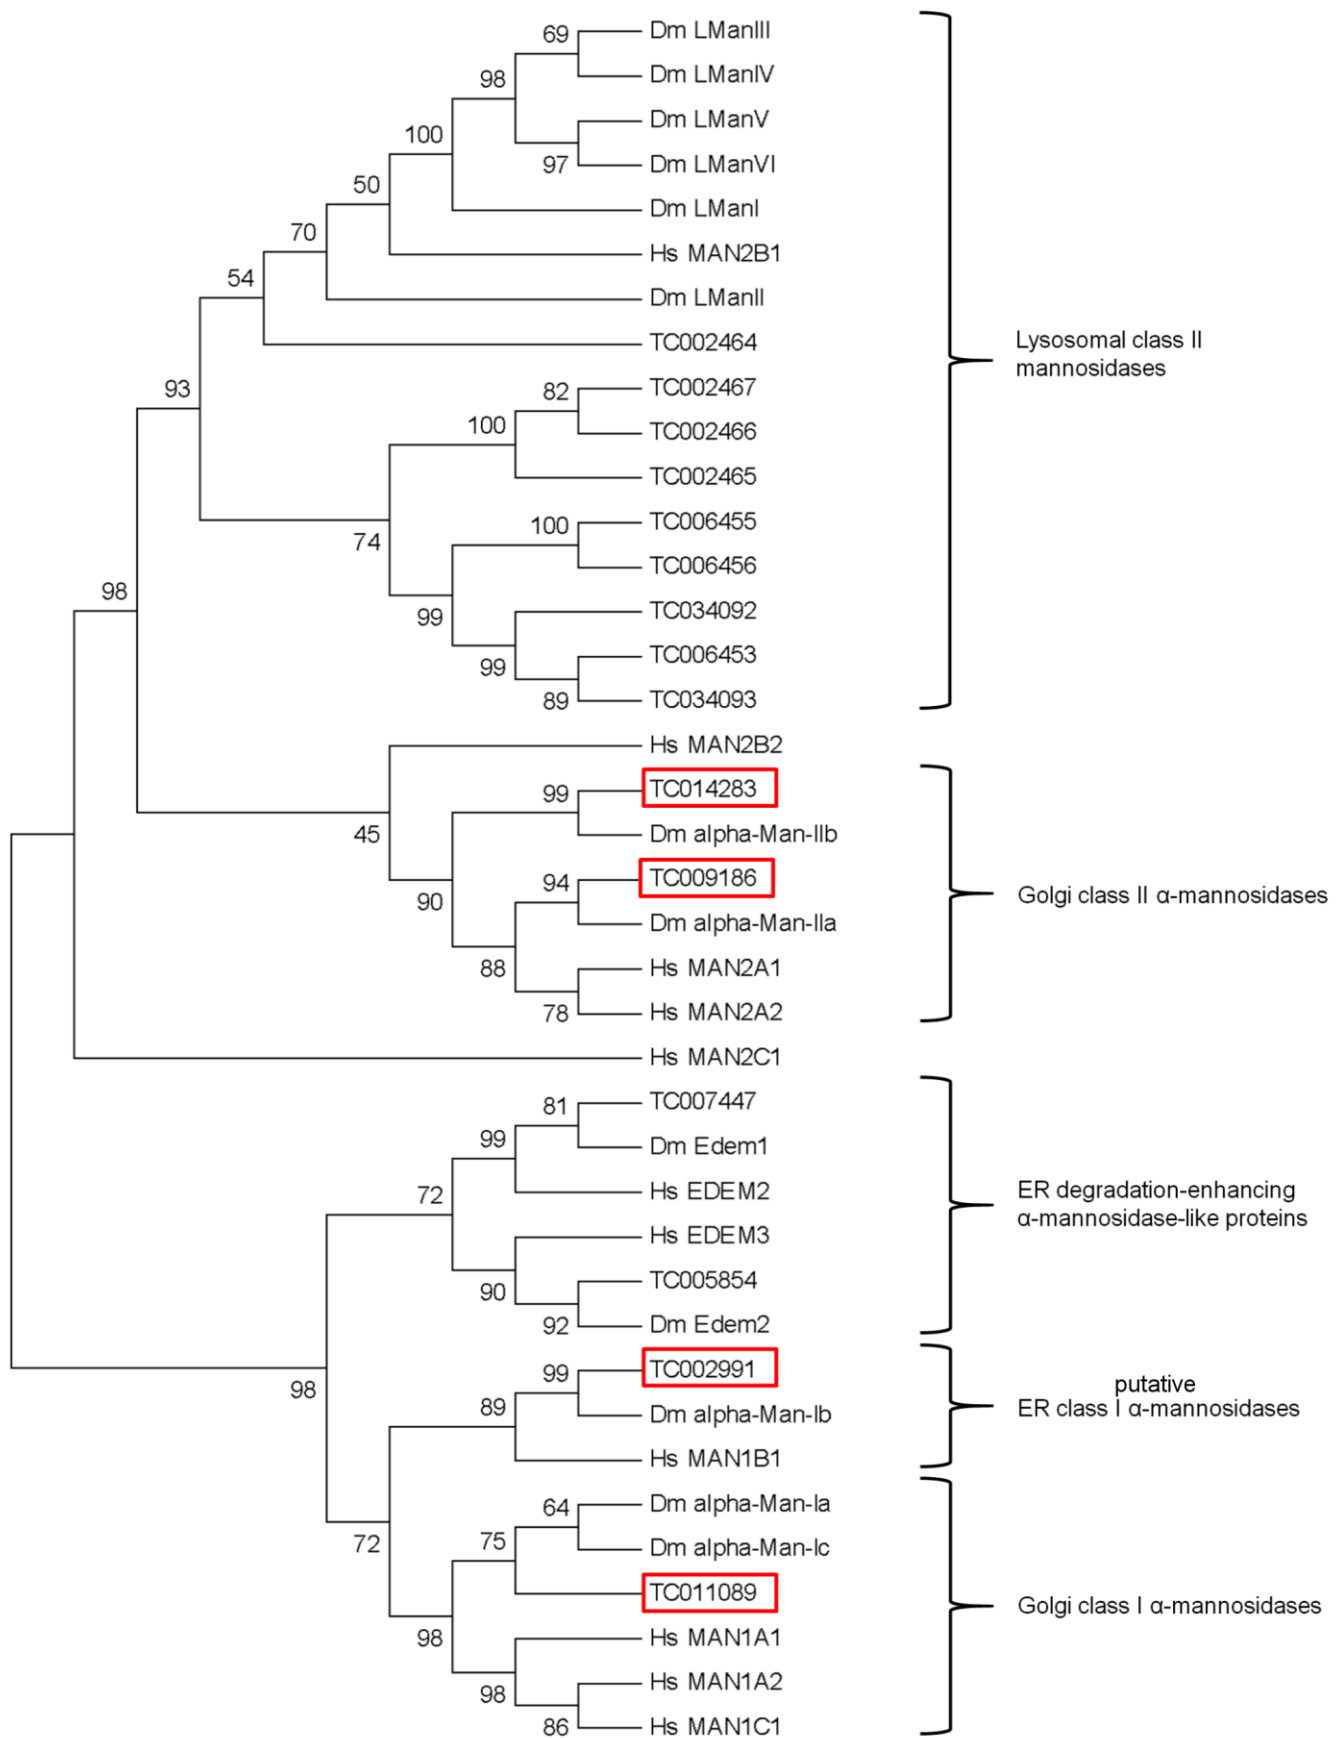

**Fig. S2. Phylogeny of putative *Tribolium*  $\alpha$ -mannosidases.** The evolutionary history was inferred by using the Maximum Likelihood method based on the Poisson correction model. Branches corresponding to partitions reproduced in less than 50% bootstrap replicates are collapsed. The percentage of replicate trees in which the associated taxa clustered together in the bootstrap test (1000 replicates) are shown next to the branches. Hs - *homo sapiens*, Dm - *Drosophila melanogaster*, TC0##### are putative *Tribolium castaneum*



orthologs obtained from <http://bioinf.uni-greifswald.de/gb2/gbrowse/tcas4>. Tribolium orthologs studied in this paper are in brackets. RefSeq accessions: Hs MAN2B1 - NP 000519.2; Hs MAN2B2 - AAH94773.1; Hs MAN2A1 - NP 002363.2; Hs MAN2A2 - NP 006113.2; Hs MAN2C1 - NP 006706.2; Hs MAN1B1 - NP 057303.2; Hs MAN1A1 - NP 065112.1; Hs MAN1A2 - NP 006690.1; Hs MAN1C1 - NP 005898.2; Hs EDEM2 - NP 060687.2; Hs EDEM3 - XP 005245556.1; Dm LManIII NP 609250.2; Dm LManIV - NP 609251.2; Dm LManV - NP 609252.1; Dm LManVI - NP 609253.1; Dm LManI - NP 609407.1; Dm LManII - NP 609408.1; Dm  $\alpha$ -Man-IIb - NP 650494.2; Dm  $\alpha$ -Man-IIa - NP 524291.2; Dm Edem1 - NP 001259152.1; Dm Edem2 - NP 609611.1; Dm  $\alpha$ -Man-Ia - NP 727408.2; Dm  $\alpha$ -Man-Ib - NP 651667.1; Dm  $\alpha$ -Man-Ic - NP\_733331.1.

Supplementary Figure 3. Examples of MALDI-MS spectra of *Tribolium* N-glycans.

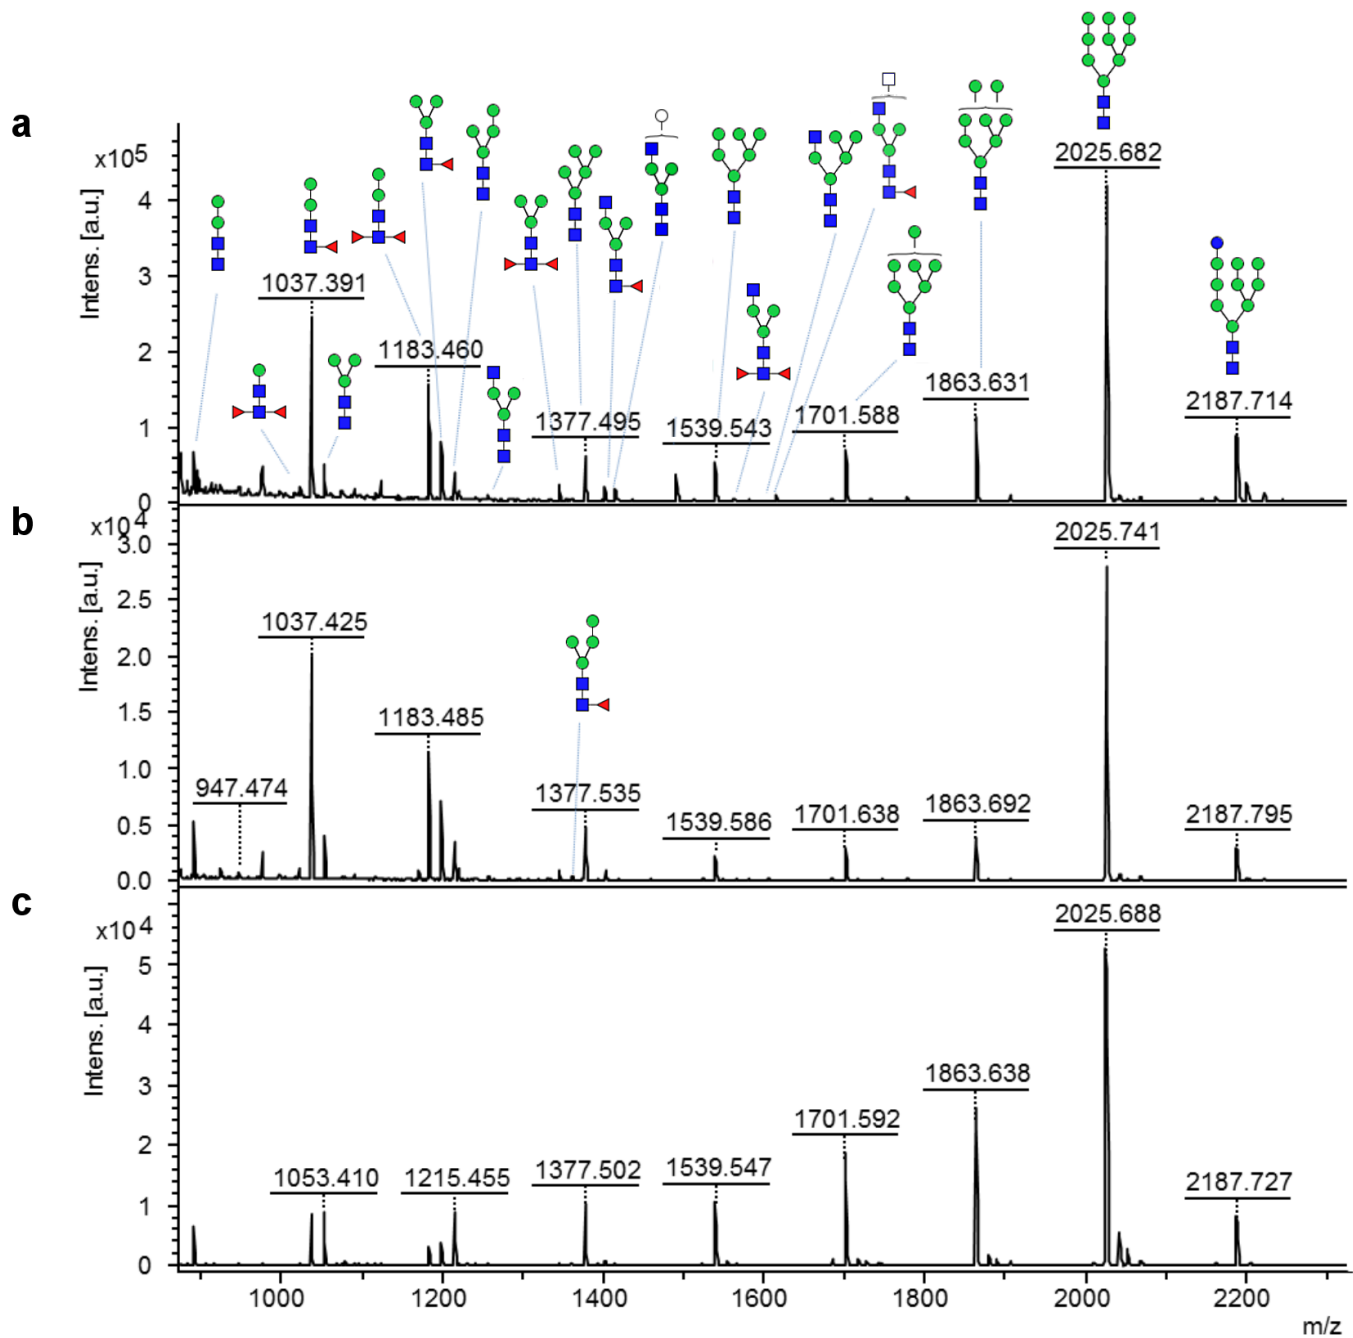

**Fig. S3. Examples of MALDI-MS spectra of *Tribolium* N-glycans.** Proteins were extracted from whole 4th instar larvae or mature adults. N-glycans were released using PNGaseA, labeled with 2-AB and analyzed by MALDI-MS using DHB matrix. **(a)** larval N-glycans. **(b)** adult N-glycans. **(c)** *Tca-Man-1a* RNAi adult N-glycans. Source files for the representative spectra are included in the Supplementary Files online.

**Supplementary Figure 4. Efficiency of RNAi mediated gene knockdown.**

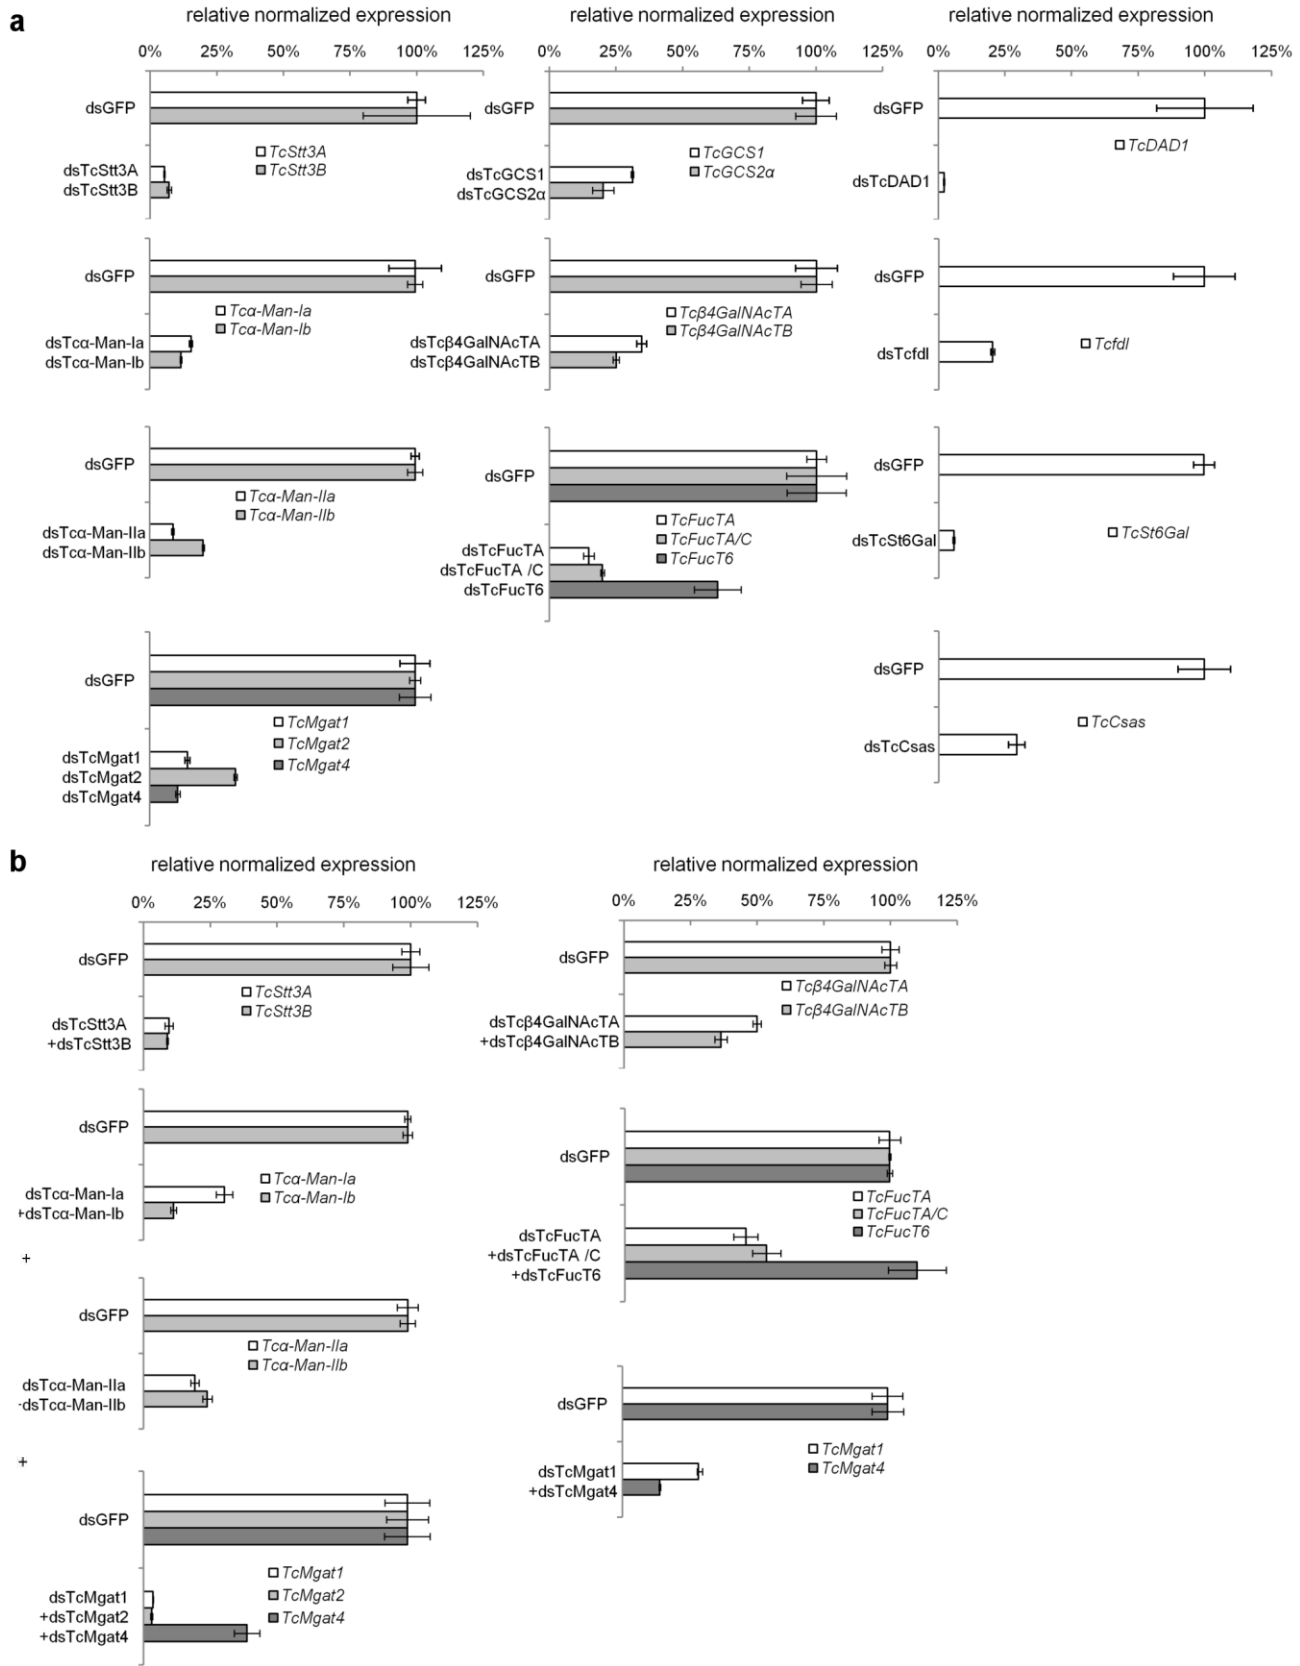

**Fig. S4. Efficiency of RNAi mediated gene knockdown.** 4<sup>th</sup> instar larvae were injected with appropriate dsRNAs to induce gene silencing or with dsGFP in case of control. Total RNA was isolated 6 days post injection. Relative gene expression was quantified with qRT-PCR using *TcRpL32* and *TcRpS6* as reference genes and normalized to control. Data are averages  $\pm$  SD (n=3). (a) Single knockdown experiments. (b) Multiple knockdown experiments performed by injection of mixture of indicated dsRNA's.

Supplementary Figure 5. RNAi of genes involved in GlcNAc attachment and removal cause minor developmental defects.

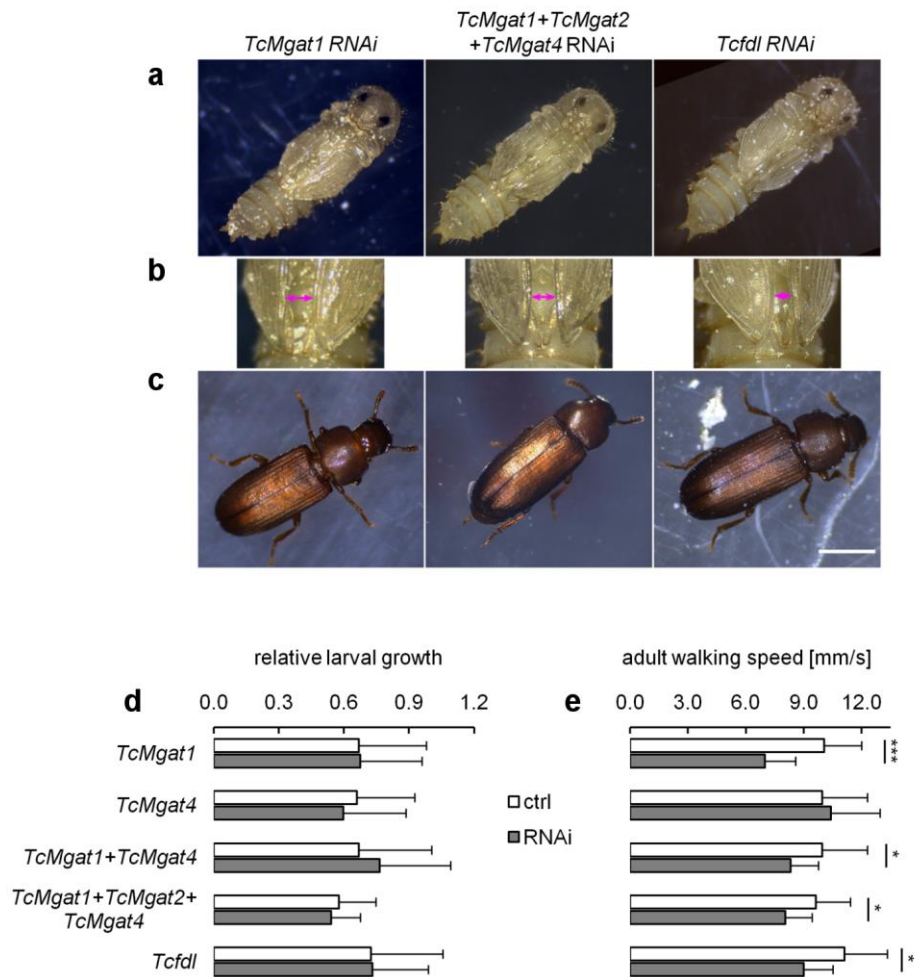

**Fig. S5. RNAi of genes involved in GlcNAc attachment and removal cause minor developmental defects.** 4<sup>th</sup> instar larvae were injected with appropriate dsRNAs to induce gene silencing or with dsGFP in case of control. (a) and (b) RNAi of *TcMgat1* and *Tcfdl* caused minor disruption of pupal elytra but not of (c) adult morphology and (d) larval growth (n=57, 57, 58, 58, 69). (e) Silencing of *TcMgat1* and *Tcfdl* reduced adult mobility (n=20, 12, 12, 12, 12). Double RNAi of *TcMgat1* and *TcMgat4* as well as triple RNAi of *TcMgat1*, *TcMgat2* and *TcMgat4* did not cause any increase in phenotype severity. Scale bar is 1 mm in (a) and (c) and 0.5 mm in (b). Error bars are SD, asterisks indicate statistically significant differences: \*\*\* P<0.001, \*\* P<0.01, \* P<0.05 (t-test).

**Supplementary Figure 6. RNAi of genes involved in N-glycan processing affect pupal elytra morphology.**

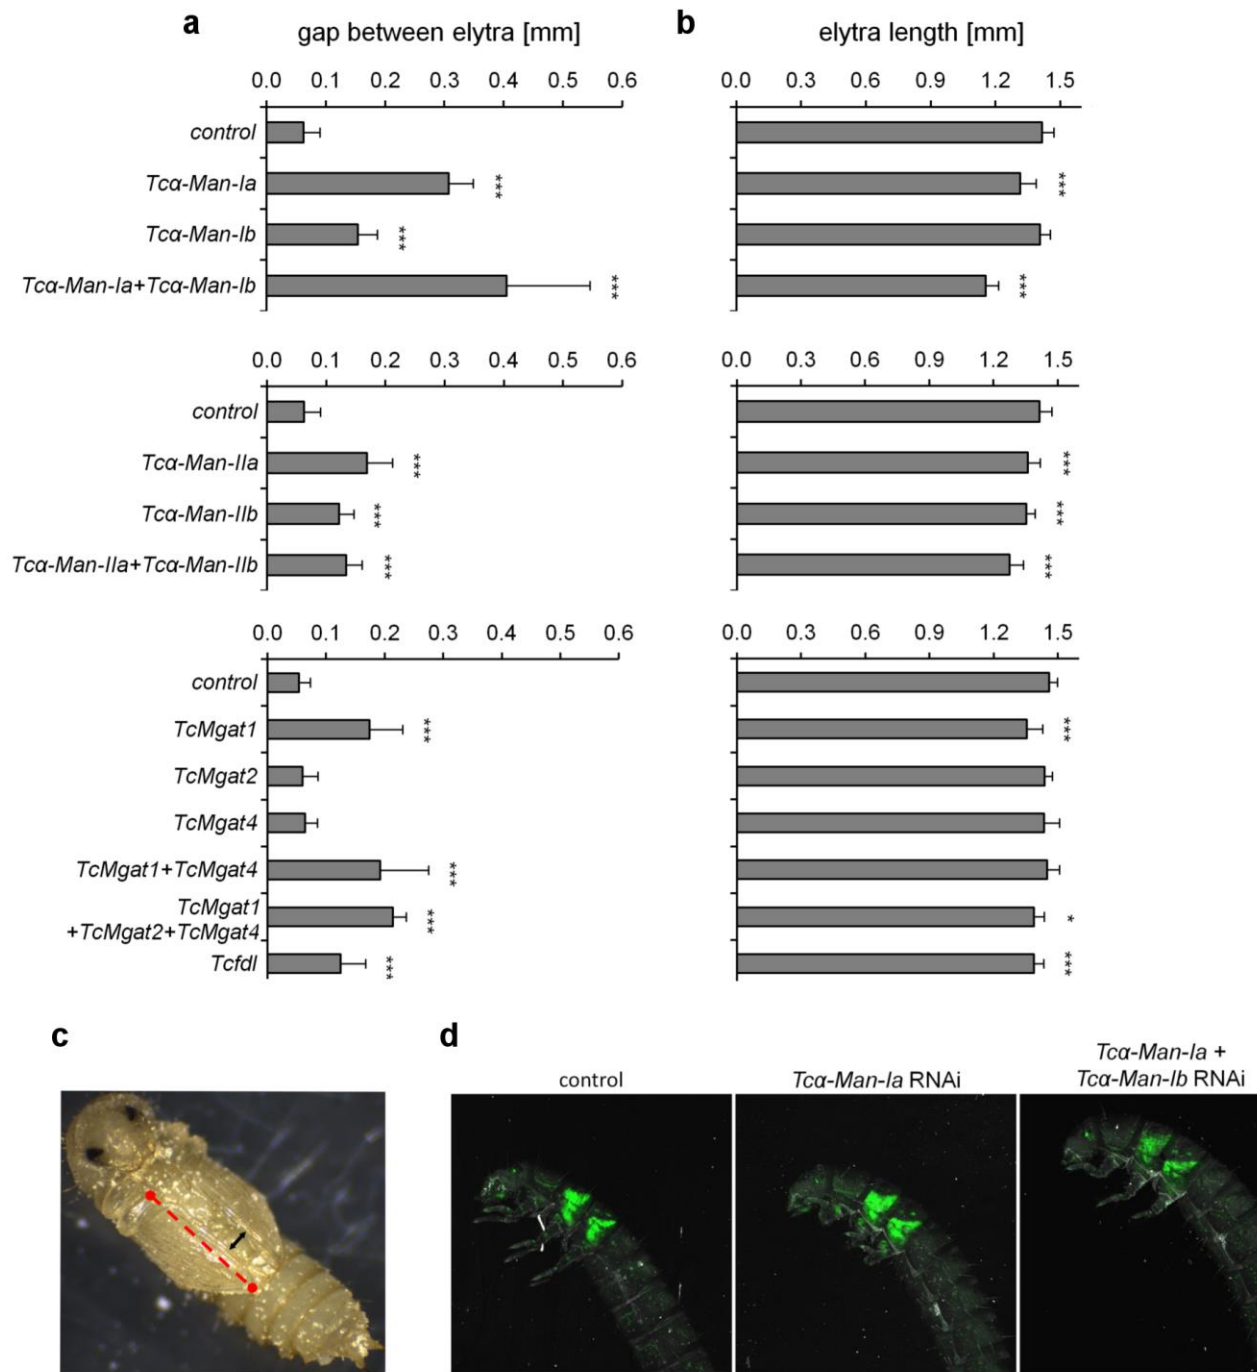

**Fig. S6. RNAi of genes involved in N-glycan processing affect pupal elytra morphology.** (a) Knockdown effects on elytra position. Elytra gap is enlarged in case of RNAi of each of the genes involved in N-glycan processing towards paucimannose glycans (all four  $\alpha$ -mannosidases, *TcMgat1* and *Tcfdl*) and not after RNAi of *TcMgat2* and *4* which are involved in complex glycan synthesis. (b) Effects of N-glycan processing genes RNAi on pupal wing length (n=11-17). (c) Scheme of elytra length (red dashed line) and gap (black double-headed arrow) measurement. To avoid errors caused by elytra curvature, the length was measured as distance from the joint between T1 tibia and tarsus to the tip of elytra. The gap between elytra was measured at 0.5 mm from the elytra tip. Error bars are SD, asterisks indicate statistically significant differences compared to control: \*\*\* P<0.001, \*\* P<0.01, \* P<0.05 (t-test). (d) RNAi of class I  $\alpha$ -mannosidases had no clear effect on development of wing and elytra wing discs in *pu11* strain. This strain expresses EYFP in wing and elytron primordia, eyes and neurons. Maximum projection confocal images are shown: green - EYFP, white - cuticle autofluorescence.

Supplementary Figure 7. RNAi of class I  $\alpha$ -mannosidases affect adult appendage development.

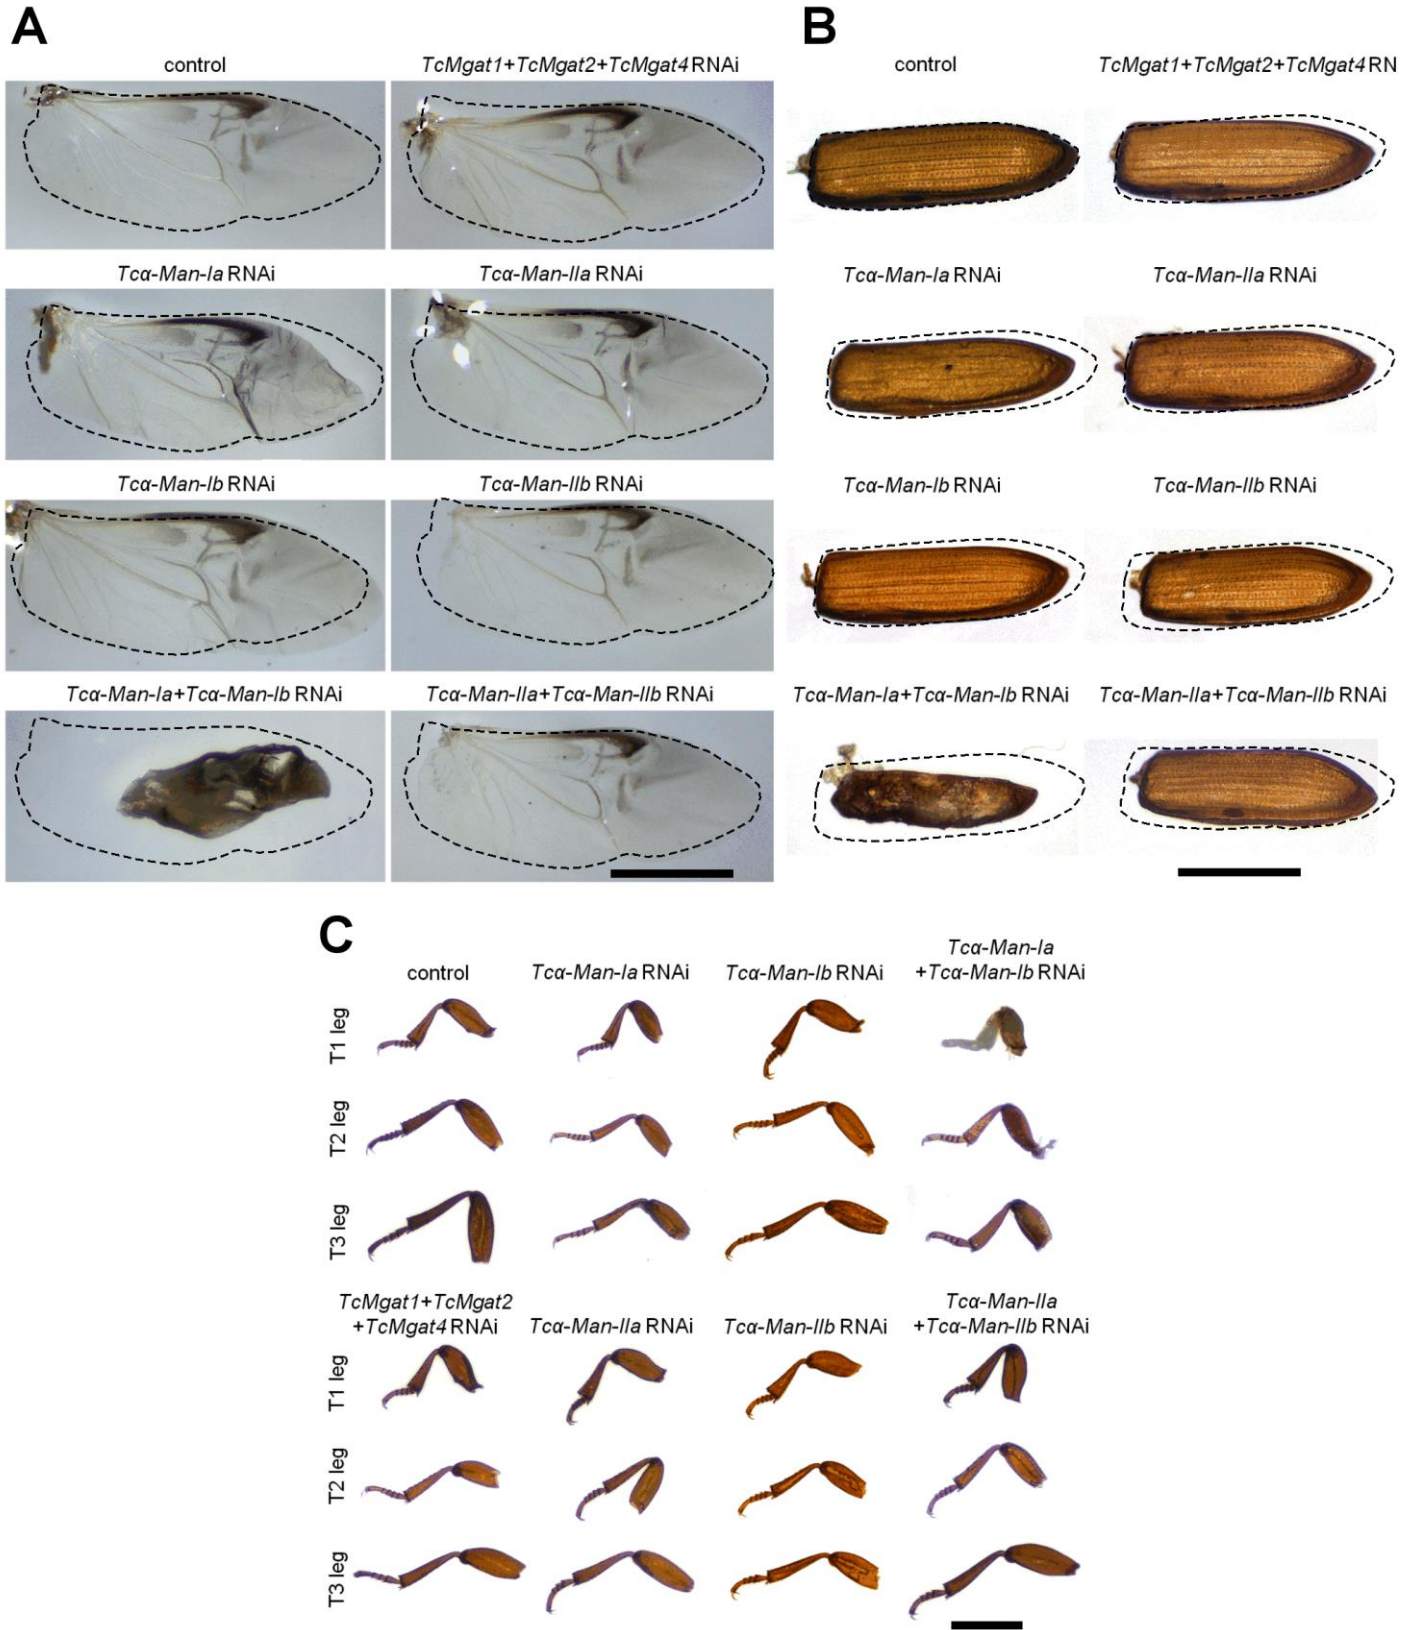

**Fig. S7. RNAi of class I  $\alpha$ -mannosidases affect adult appendage development.** (a) RNAi effects on adult wings, (b) adult elytra and (c) adult legs. Knockdown of *Tcα-Man-Ia* caused minor malformations: wrinkled and smaller wings and elytra. Double knockdown of *Tcα-Man-Ia* and *Tcα-Man-Ib* completely blocked wing and elytra development and interfered with proper leg sclerotization (especially visible on T1 legs). Other knockdowns caused no obvious effects. Dashed line indicate shape of wing and elytron of control beetles. Scale bars in (A) and (B) are 1 mm. Scale bar in (C) is 0.5 mm.

**Supplementary Figure 8. Silencing of genes potentially involved in complex glycan synthesis and sialylation caused minor or no effects.**

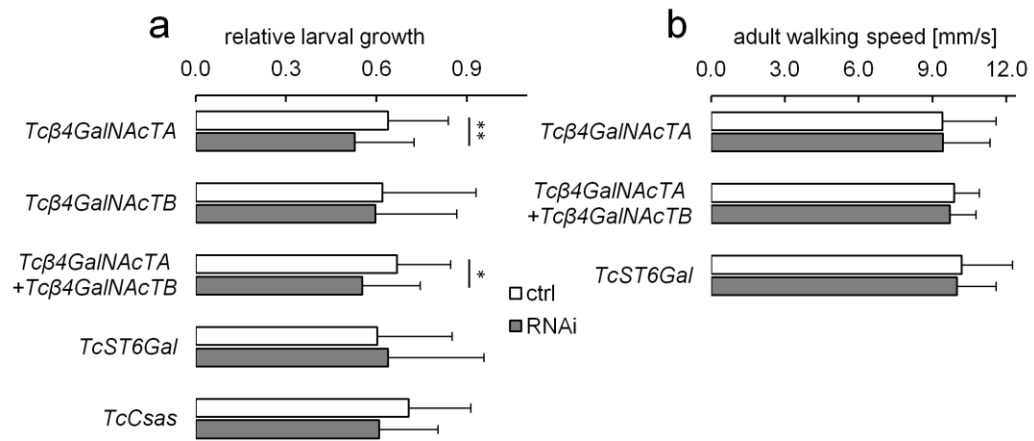

**Fig. S8. Silencing of genes potentially involved in complex glycan synthesis and sialylation caused minor or no effects. (a)** Only RNAi of *Tcβ4GalNAcTA* caused minor reduction of larval growth (n=49-63). **(b)** There was no effect on adult movement speed (n= 15-25). Error bars are SD, asterisks indicate P<0.001 (\*\*\*), P<0.01 (\*\*), P<0.05 (\*).
